# Supplementary material
Source: PubMed Central journal article supplement (PMC2839195)

**Figure e-1. Associations between the 6MWT distance and measures of motor function, pulmonary function, and strength.** The 6MWT distance was significantly associated with the HFMSE, log-transformation 10 meter walk/run time, and knee flexion HHD but not with FVC or knee extension HHD. 6MWT = Six-minute Walk Test; HFMSE = Hammersmith Functional Motor Scale – Expanded; FVC = Forced Vital Capacity

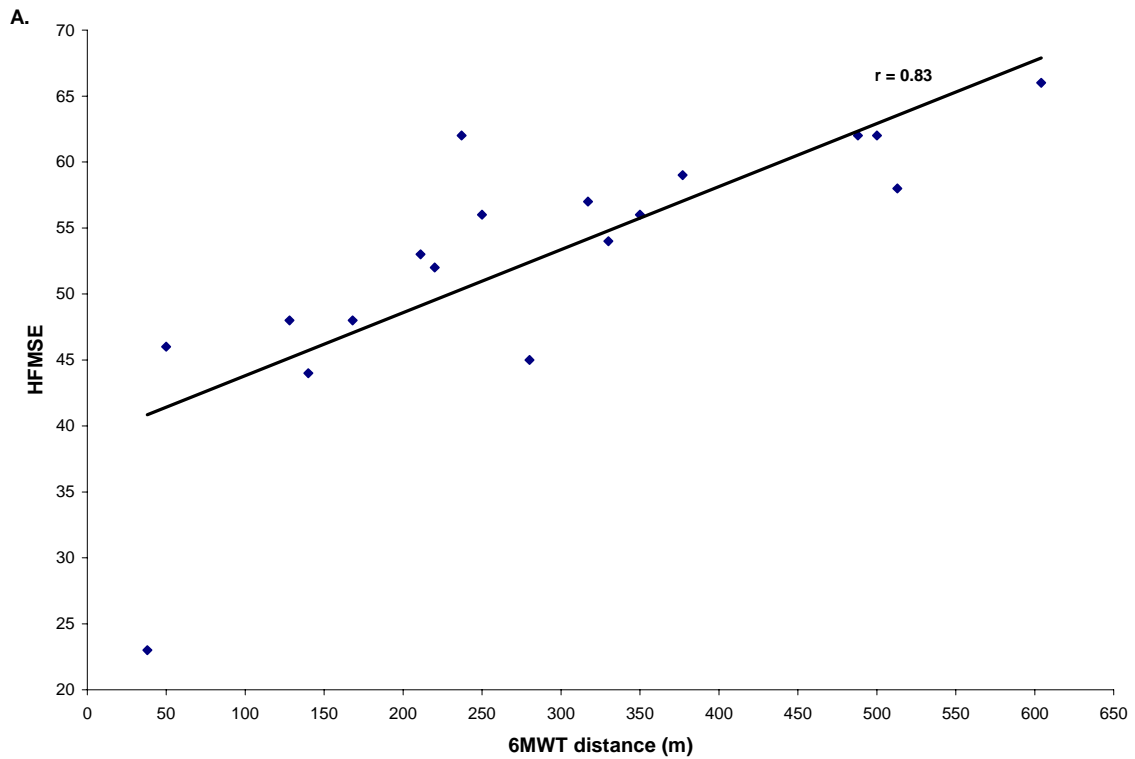

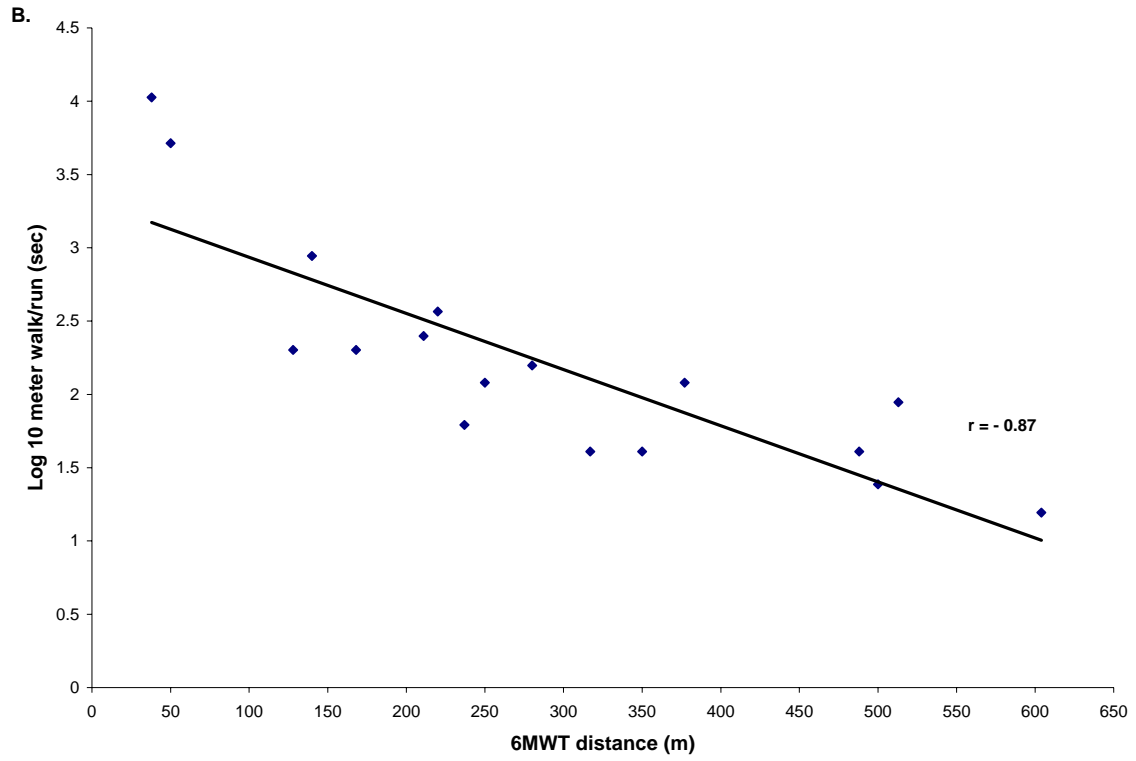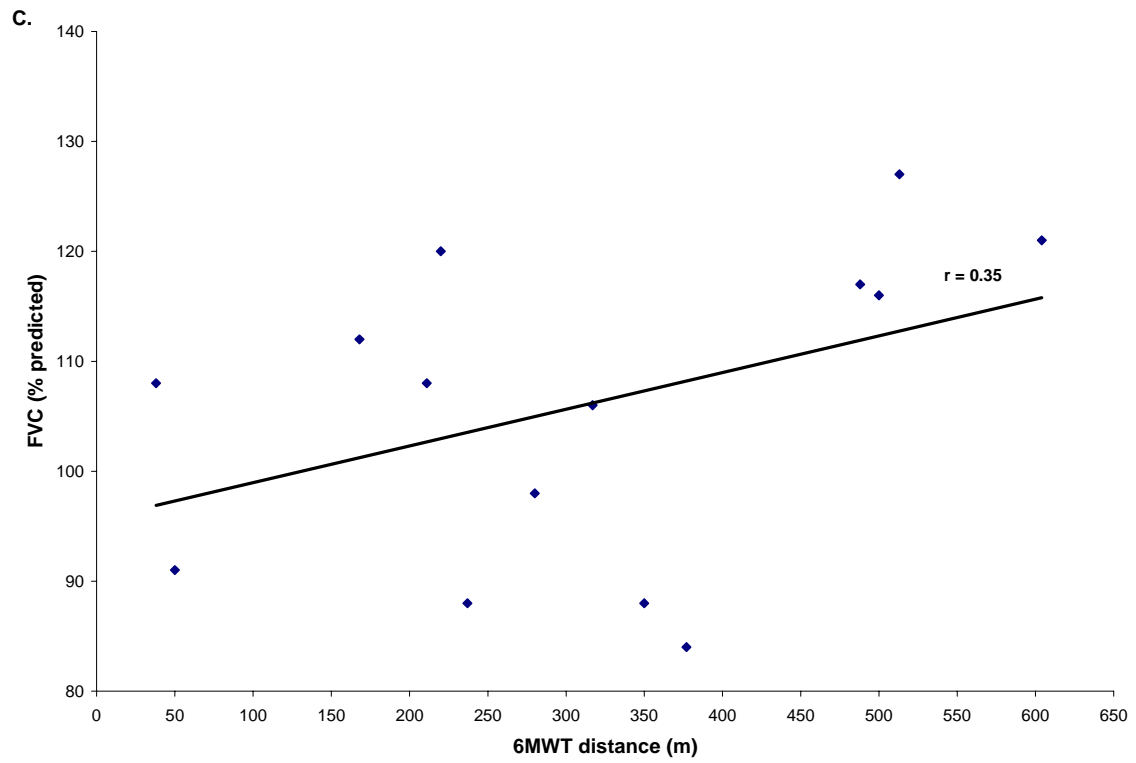

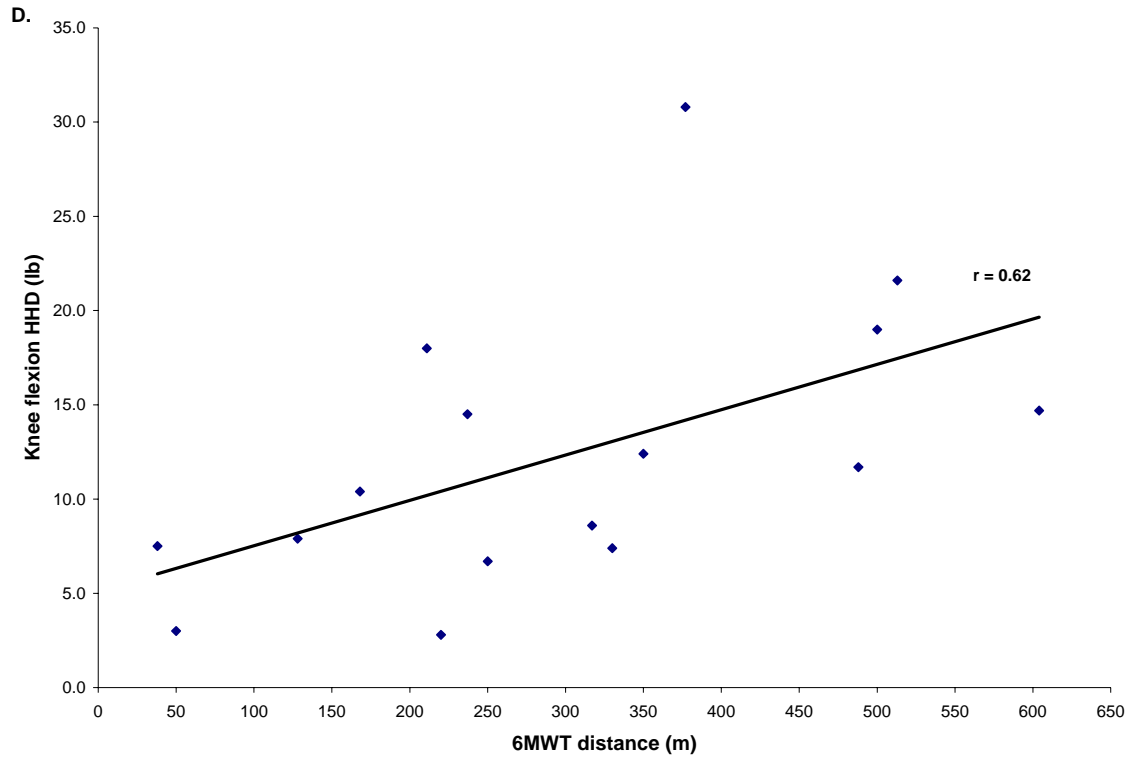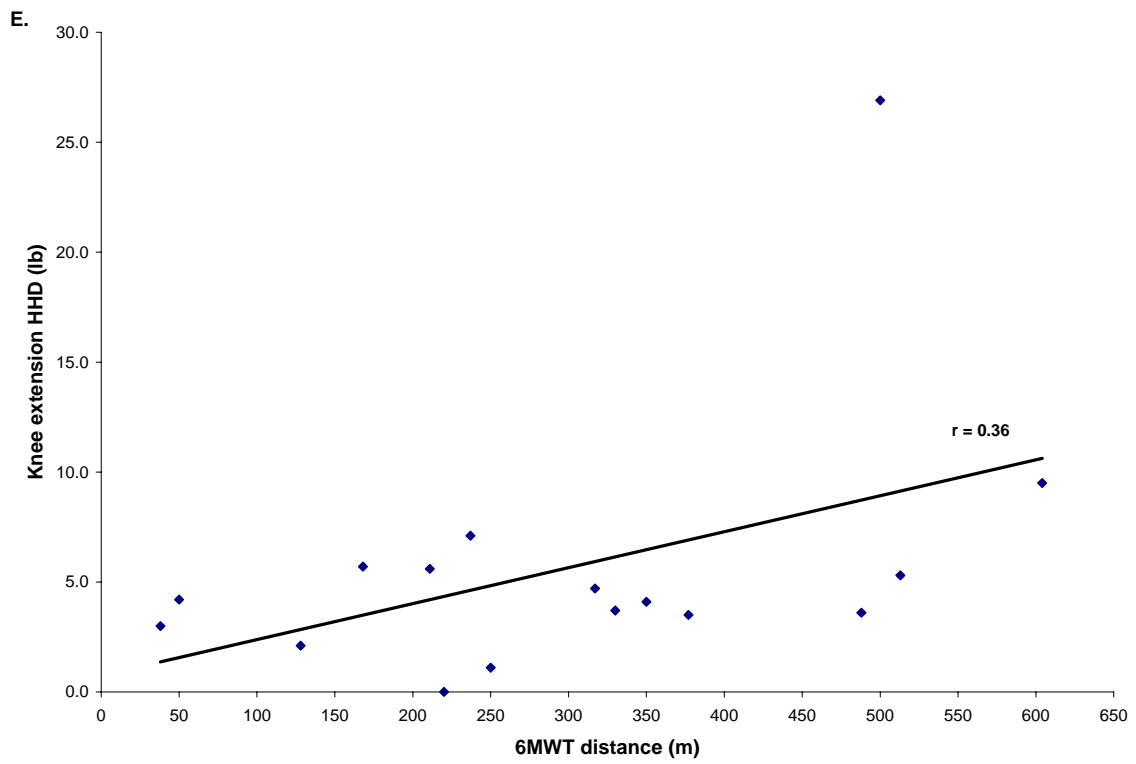

Supplement: supp_74_10_833__1.pdf [file supp_74_10_833__1.pdf]
